# Supplementary material for: Biological Evaluations, NMR Analyses, Molecular Modeling Studies, and Overview of the Synthesis of the Marine Natural Product (−)-Mucosin
Source: MDPI journal article supplement (doi:10.3390/molecules29050994), 2024-02-24
Supplement: s1 [file s1]

# Biological Evaluations, NMR Analyses, Molecular Modelling Studies, and Overview of the Synthesis of the Marine Natural Product (–)-Mucosin

Jens M. J. Nolsøe<sup>1,6</sup>, Jarl Underhaug<sup>2</sup>, Åshild Moi Sørskar<sup>3</sup>, Simen Gjelseth Antonsen<sup>4</sup>, Karl E. Malterud<sup>3</sup>, Osman Gani<sup>3</sup>, Qiong Fan,<sup>5</sup> Marit Hjorth,<sup>5</sup> Thomas Sæther<sup>5</sup>, Trond V. Hansen<sup>1,3</sup>, and Yngve H. Stenstrøm<sup>1,4\*</sup>

- <sup>1</sup> Faculty of Chemistry, Biotechnology and Food Science, Norwegian University of Life Sciences, P.O. Box 5003, NO-1433 Ås, Norway; [yngve.stenstrom@nmbu.no](mailto:yngve.stenstrom@nmbu.no) (Y.H.S.); [t.v.hansen@farmasi.uio.no](mailto:t.v.hansen@farmasi.uio.no) (T.V.H.), [jens.m.nolsoe@nord.no](mailto:jens.m.nolsoe@nord.no) (J.M.J.N.).
  - <sup>2</sup> Department of Chemistry, University of Bergen, Allégaten 41, NO-5007, Bergen, Norway; [jarl.underhaug@uib.no](mailto:jarl.underhaug@uib.no) (J.U.).
  - <sup>3</sup> Department of Pharmacy, Section for Pharmaceutical Chemistry, University of Oslo, P.O. Box NO-1068, 0316 Oslo, Norway; [a.m.sorskar@farmasi.uio.no](mailto:a.m.sorskar@farmasi.uio.no) (Å.M.S.); [k.e.malterud@farmasi.uio.no](mailto:k.e.malterud@farmasi.uio.no) (K.E.M.); [osman.gani@farmasi.uio.no](mailto:osman.gani@farmasi.uio.no) (O.M.); [t.v.hansen@farmasi.uio.no](mailto:t.v.hansen@farmasi.uio.no) (T.V.H.).
  - <sup>4</sup> Department of Mechanical, Electronic and Chemical Engineering, Faculty of Technology, Art and Design, Oslo Metropolitan University, NO-0130 Oslo, Norway; [simenant@oslomet.no](mailto:simenant@oslomet.no) (S.G.A.).
  - <sup>5</sup> Department of Molecular Medicine, Institute of Basic Medical Sciences, Faculty of Medicine, University of Oslo, NO-0317 Oslo, Norway; [qiong.fan@medisin.uio.no](mailto:qiong.fan@medisin.uio.no) (Q.F.); [marit.hjorth@medisin.uio.no](mailto:marit.hjorth@medisin.uio.no) (M.H.); [thomas.sather@medisin.uio.no](mailto:thomas.sather@medisin.uio.no) (T.S.).
  - <sup>6</sup> Faculty of Biosciences and Aquaculture, Nord University, P.O. Box NO-1490, 8049 Bodø, Norway; [jens.m.nolsoe@nord.no](mailto:jens.m.nolsoe@nord.no) (J.M.J.N.).
- Correspondence: [yngve.stenstrom@nmbu.no](mailto:yngve.stenstrom@nmbu.no); Tel.: +47-67232559 (Y.H.S.).

## Innhold

|                          |   |
|--------------------------|---|
| General Information..... | 1 |
| NMR-data .....           | 2 |

### General Information

The stated yields are based on isolated material.

The NMR spectra were acquired at 298 K on an 850 MHz Bruker AVANCE III HD equipped with a TCI CryoProbe (Bruker BioSpin, Billerica, MA, USA). Coupling constants (*J*) are reported in hertz and chemical shifts ( $\delta$ ) are reported in parts per million (ppm), referenced to the residual solvent signal (7.26 ppm for <sup>1</sup>H and 77.16 ppm for <sup>13</sup>C).

PROTON

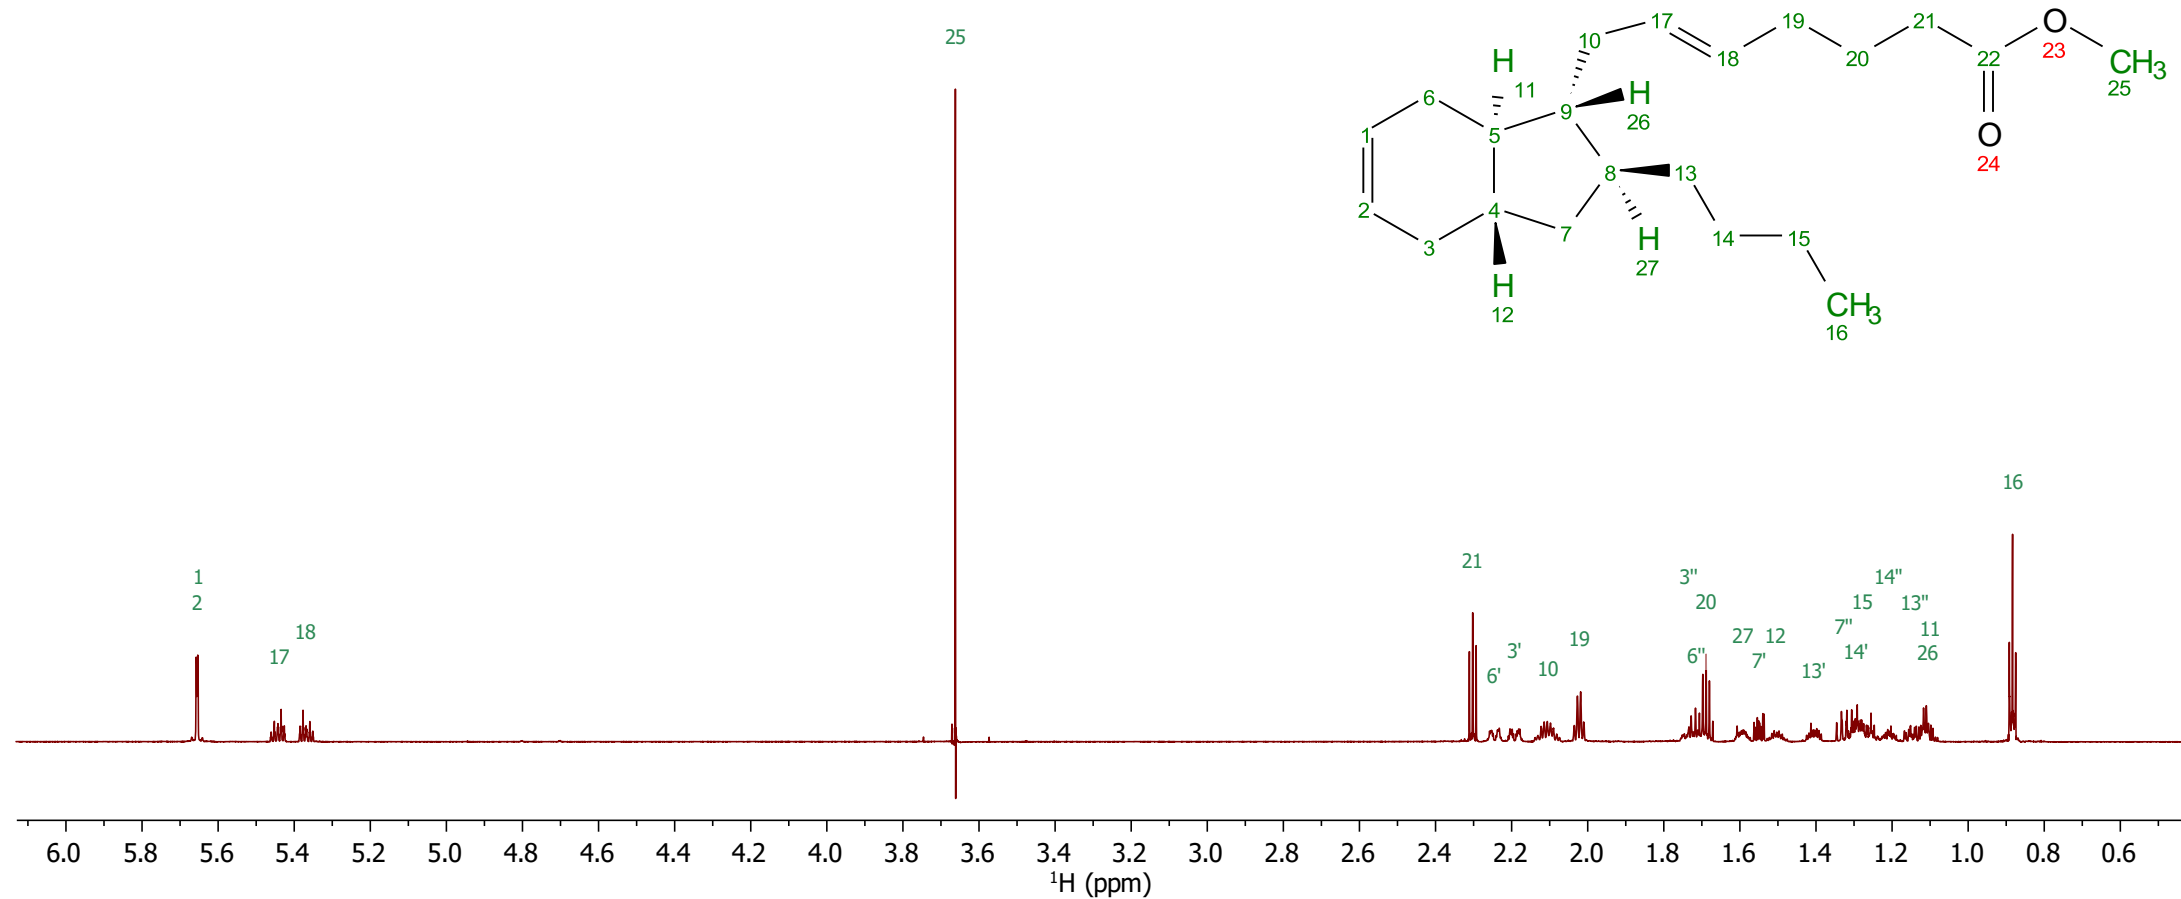

C13

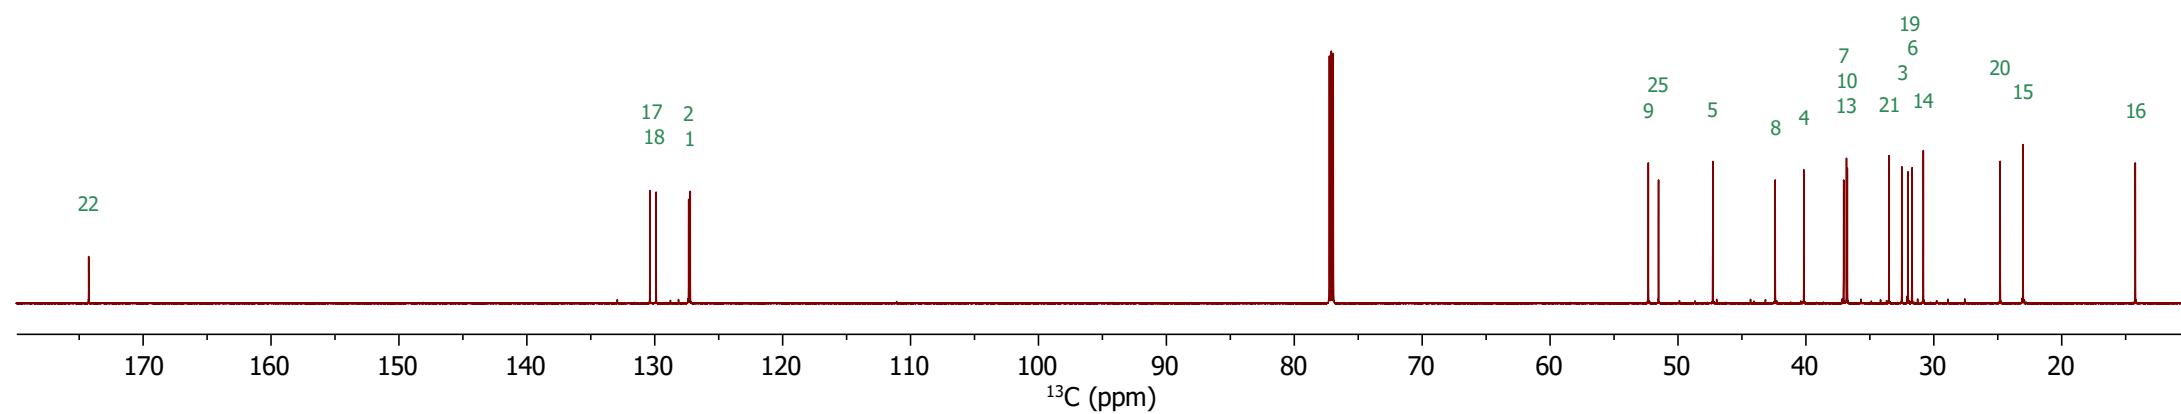

Figure S1:  $^1\text{H}$  and  $^{13}\text{C}$  NMR of **7** with assignment

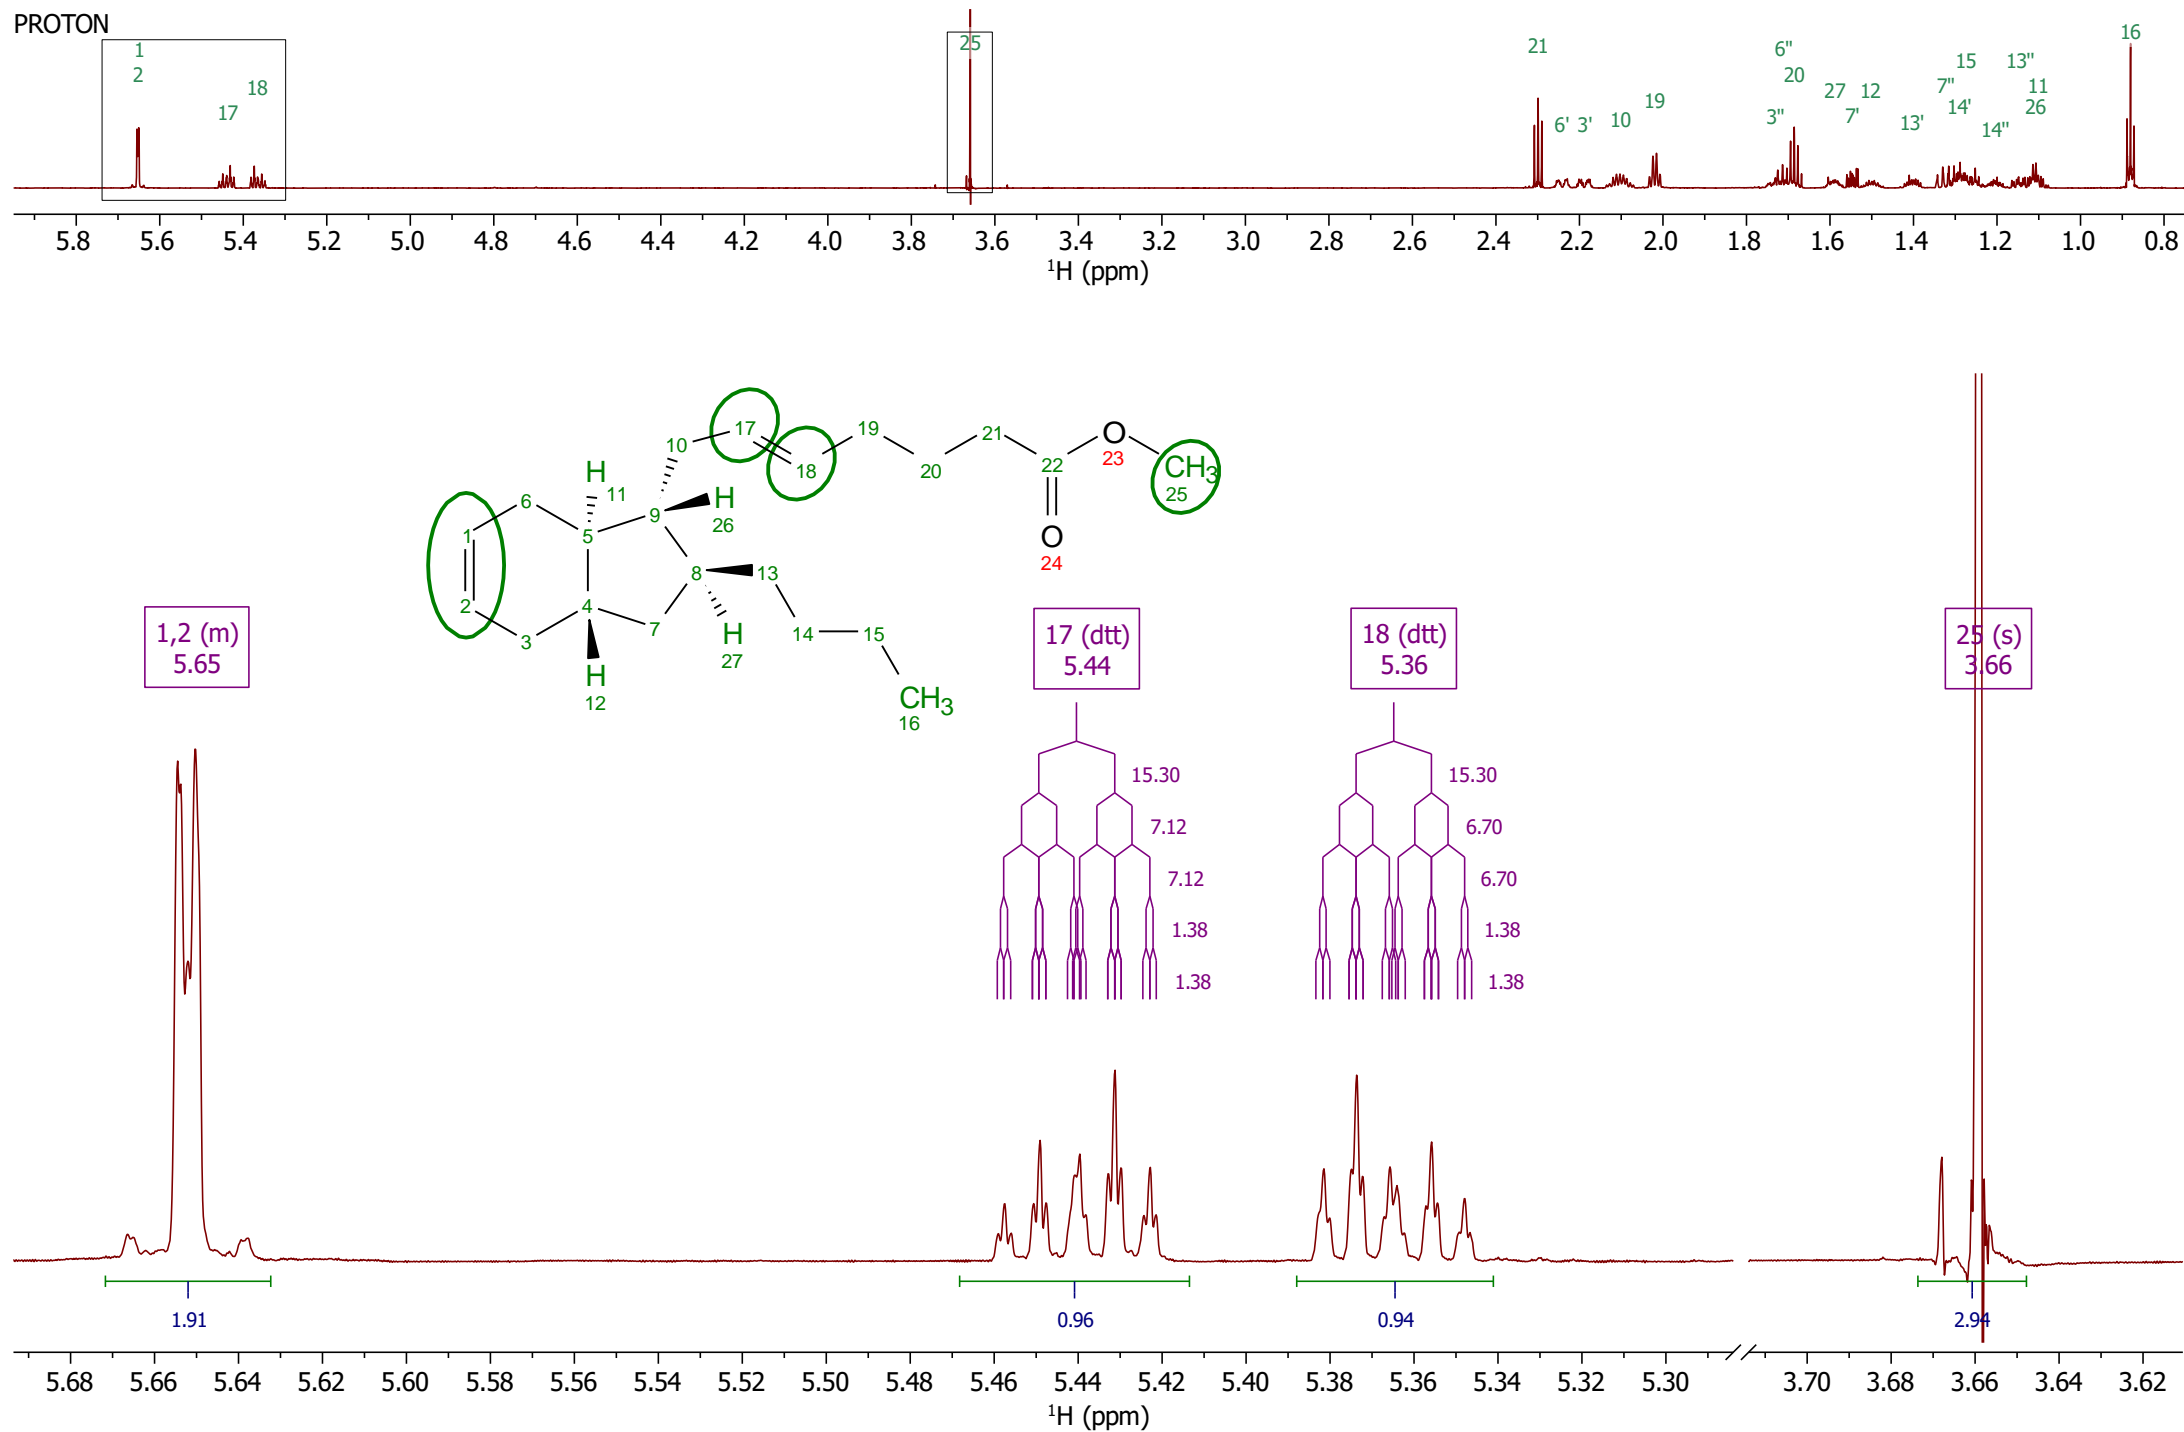

Figure S2: Extract of  $^1\text{H}$  NMR of **7** with assignment

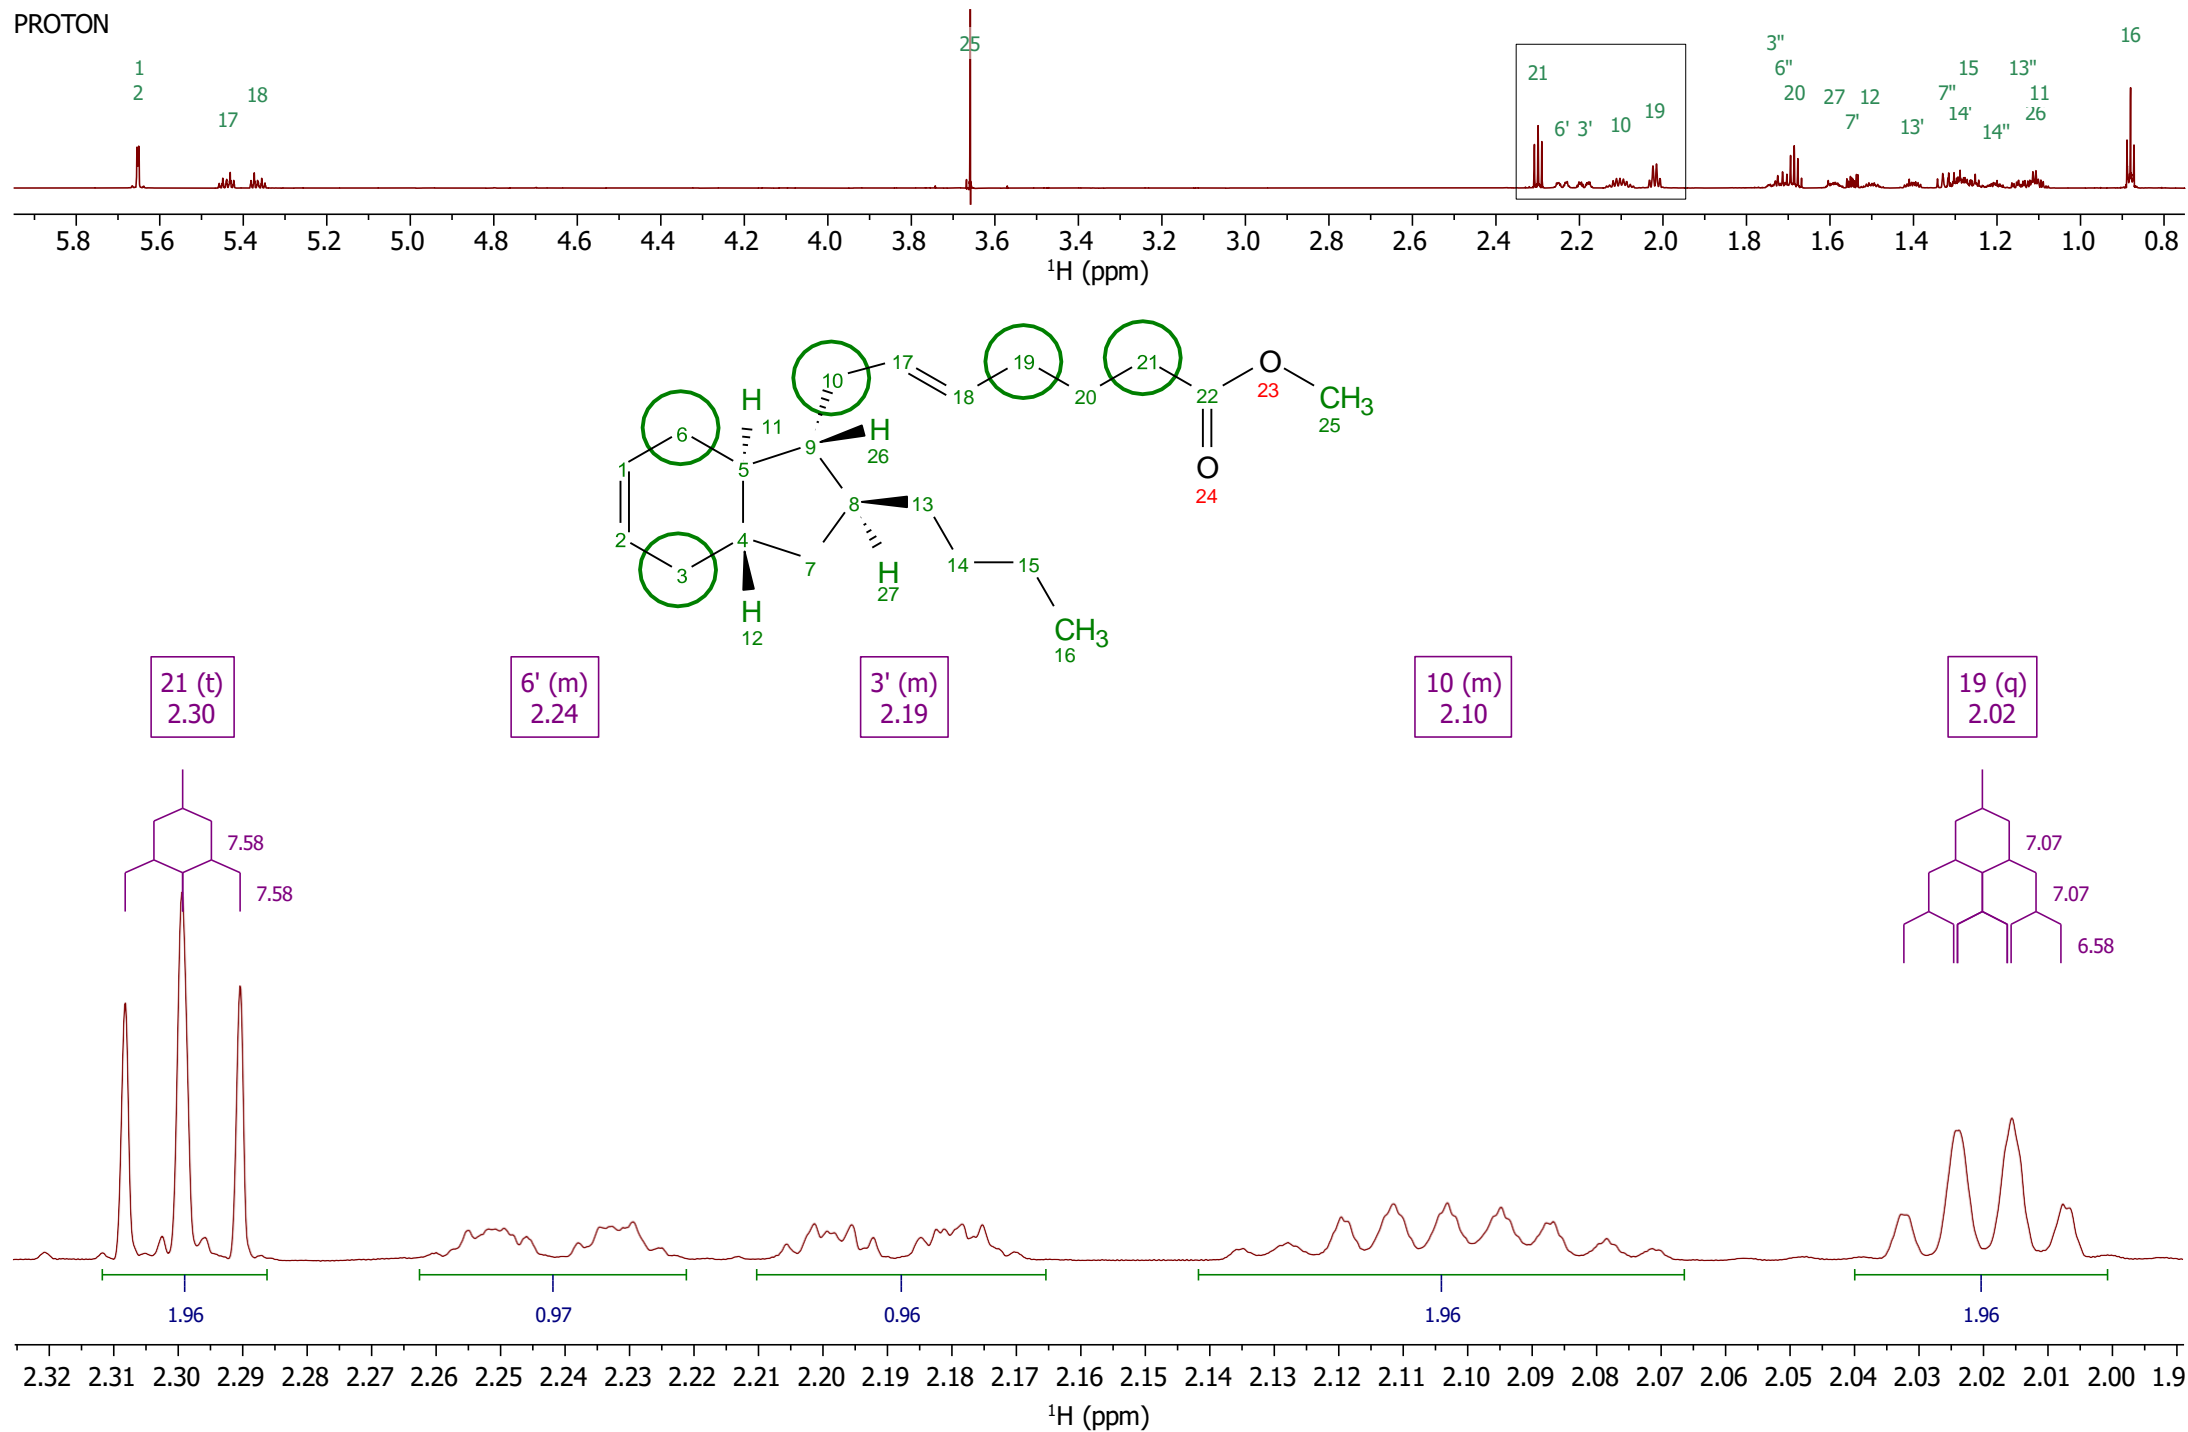

Figure S3: Extract of  $^1\text{H}$  NMR of **7** with assignment



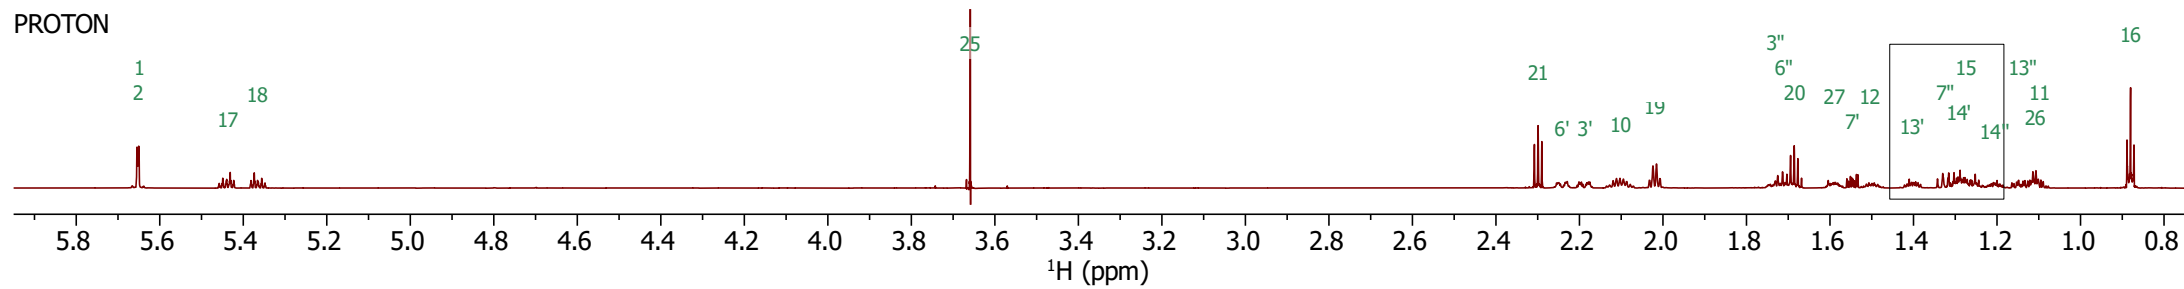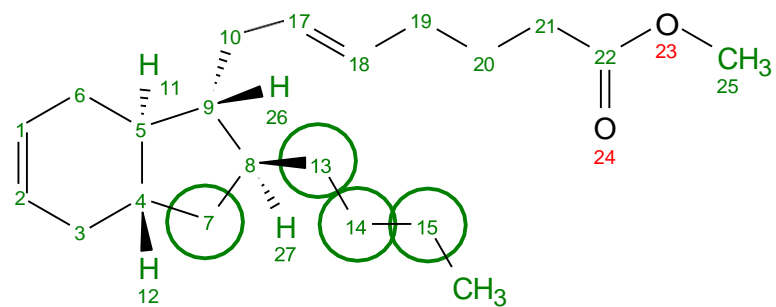

13' (dddd)  
1.40

7'' (ddd)  
1.32

14' (m)  
1.29

15 (m)  
1.27

14'' (m)  
1.21

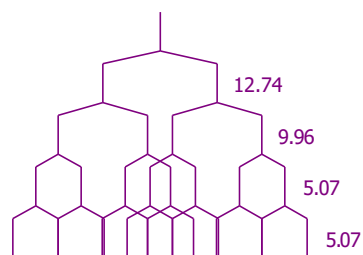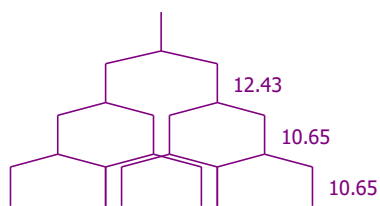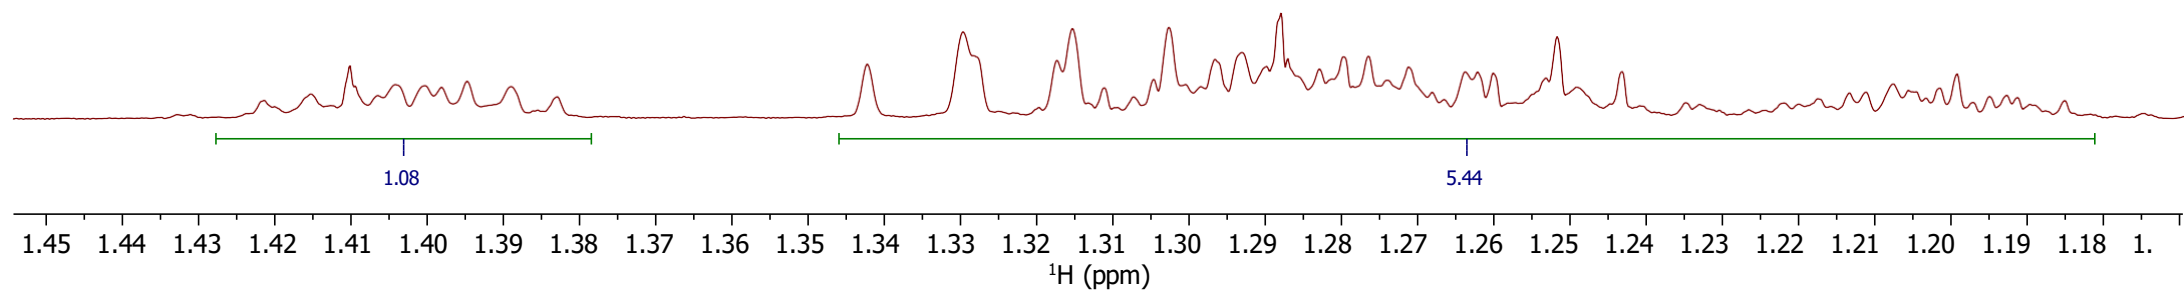

Figure S5: Extract of  $^1\text{H}$  NMR of **7** with assignment

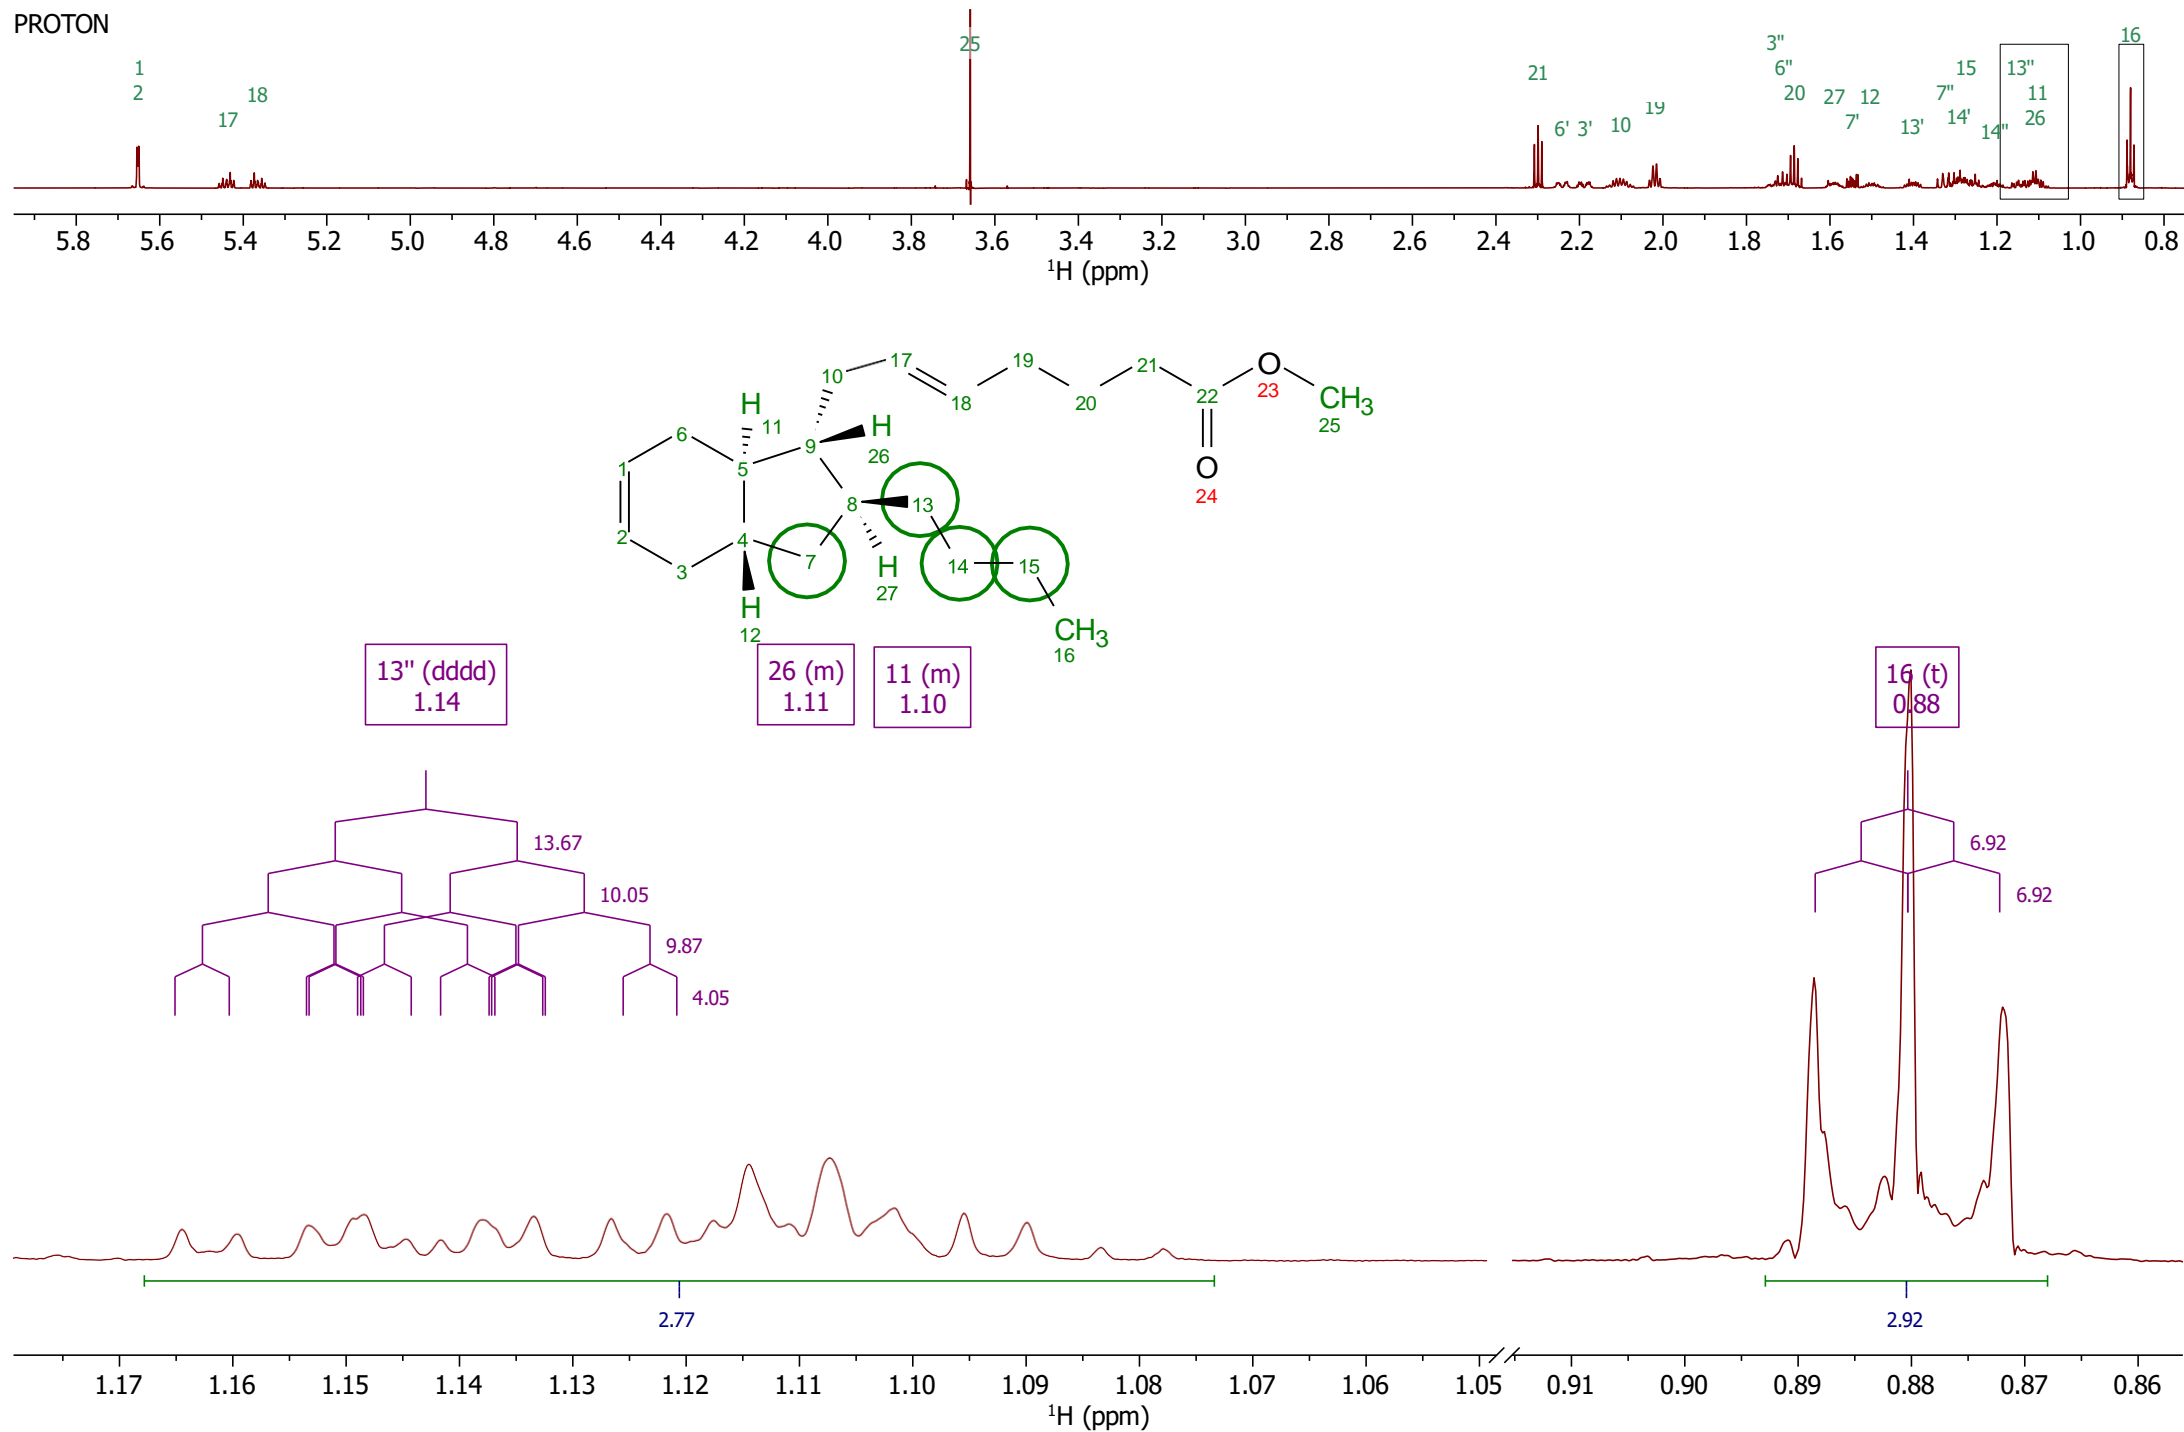

Figure S6: Extract of  $^1\text{H}$  NMR of **7** with assignment





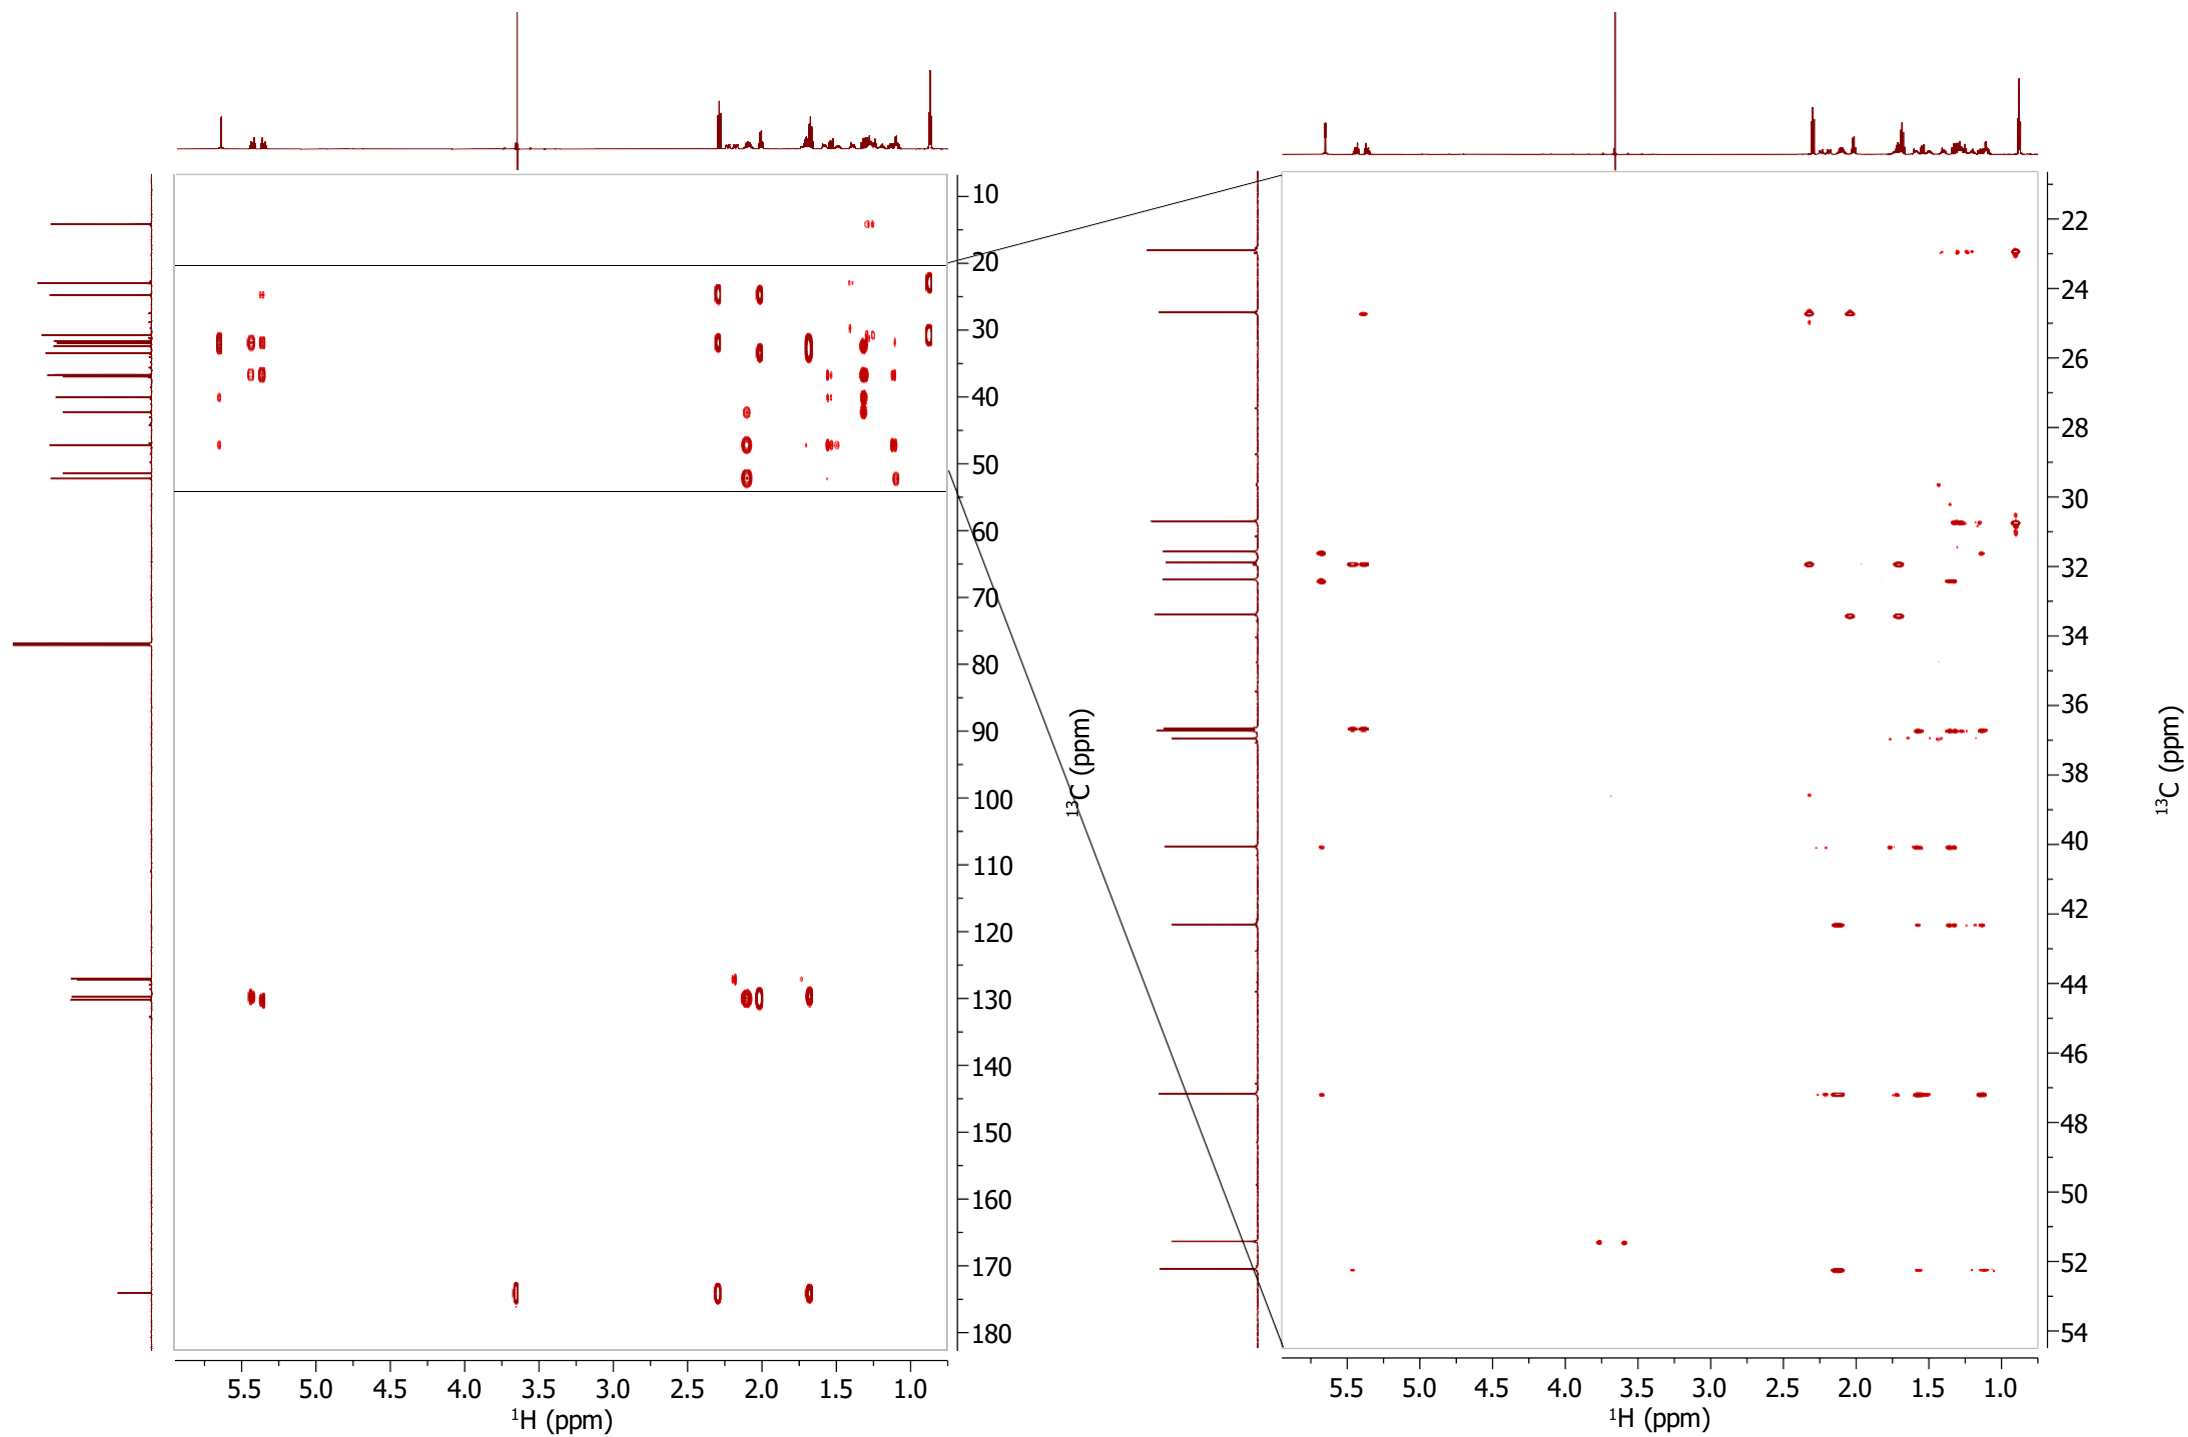

Figure S8: HMBC (left) and selective HMBC (right) of **7**

| No   | Atom Type       | $\delta_{\text{H}}$ (Multiplicity, $J$ , nH) | $\delta_{\text{C}}$ |
|------|-----------------|----------------------------------------------|---------------------|
| 1    | CH              | 5.65 (m, 1H)                                 | 127.2               |
| 2    | CH              | 5.65 (m, 1H)                                 | 127.3               |
| 17   | CH              | 5.44 (dtt, 15.3, 7.1, 1.4 Hz, 1H)            | 130.2               |
| 18   | CH              | 5.37                                         | 130.0               |
| 25   | CH <sub>3</sub> | 3.66 (s, 3H)                                 | 51.4                |
| 21   | CH <sub>2</sub> | 2.30 (t, 7.6 Hz, 2H)                         | 33.4                |
| 6'   | CH <sub>2</sub> | 2.24 (m, 1H)                                 | 31.6                |
| 3'   | CH <sub>2</sub> | 2.19 (m, 1H)                                 | 32.4                |
| 10   | CH <sub>2</sub> | 2.10 (m, 2H)                                 | 36.7                |
| 19   | CH <sub>2</sub> | 2.02 (q, 7.1 Hz, 2H)                         | 31.9                |
| 3"   | CH <sub>2</sub> | 1.73 (m, 1H)                                 | 32.4                |
| 6"   | CH <sub>2</sub> | 1.71 (m, 1H)                                 | 31.6                |
| 20   | CH <sub>2</sub> | 1.69 (p, 7.5 Hz, 2H)                         | 24.7                |
| 8/27 | CH              | 1.59 (m, 1H)                                 | 42.3                |
| 7'   | CH <sub>2</sub> | 1.55 (ddd, 12.2, 7.3, 2.9 Hz, 1H)            | 37.0                |
| 4/12 | CH              | 1.50 (m, 1H)                                 | 40.1                |
| 13'  | CH <sub>2</sub> | 1.40 (dddd, 12.7, 10.0, 5.1, 5.1 Hz, 1H)     | 36.7                |
| 7"   | CH <sub>2</sub> | 1.32 (ddd, 12.4, 10.7, 10.7 Hz, 1H)          | 37.0                |
| 14'  | CH <sub>2</sub> | 1.29 (m, 1H)                                 | 30.7                |
| 15   | CH <sub>2</sub> | 1.27 (m, 2H)                                 | 22.9                |
| 14"  | CH <sub>2</sub> | 1.21 (m, 1H)                                 | 30.7                |
| 13"  | CH <sub>2</sub> | 1.14 (dddd, 13.7, 10.0, 9.9, 4.0 Hz, 1H)     | 36.7                |
| 9/26 | CH              | 1.11 (m, 1H)                                 | 52.2                |
| 5/11 | CH              | 1.10 (m, 1H)                                 | 47.3                |
| 16   | CH <sub>3</sub> | 0.88 (t, 6.9 Hz, 3H)                         | 14.2                |
| 22   | C               | -                                            | 174.2               |

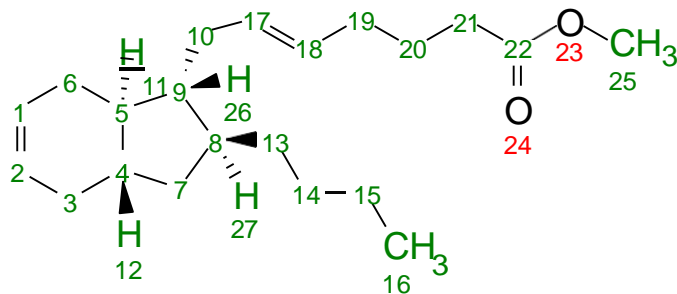

<sup>1</sup>H NMR (850 MHz, CDCl<sub>3</sub>)  $\delta$  5.68 – 5.63 (m, 2H), 5.44 (dtt,  $J$  = 15.3, 7.1, 1.4 Hz, 1H), 5.36 (dtt,  $J$  = 15.3, 6.7, 1.4 Hz, 1H), 3.66 (s, 3H), 2.30 (t,  $J$  = 7.6 Hz, 2H), 2.26 – 2.22 (m, 1H), 2.21 – 2.16 (m, 1H), 2.15 – 2.06 (m, 2H), 2.02 (q,  $J$  = 7.1 Hz, 2H), 1.76 – 1.71 (m, 1H), 1.72 – 1.69 (m, 1H), 1.69 (p,  $J$  = 7.5 Hz, 2H), 1.61 – 1.57 (m, 1H), 1.55 (ddd,  $J$  = 12.2, 7.3, 2.9 Hz, 1H), 1.53 – 1.47 (m, 1H), 1.40 (dddd,  $J$  = 12.7, 10.0, 5.1, 5.1 Hz, 1H), 1.32 (ddd,  $J$  = 12.4, 10.7, 10.7 Hz, 1H), 1.30 – 1.28 (m, 1H), 1.28 – 1.23 (m, 2H), 1.23 – 1.18 (m, 1H), 1.14 (dddd,  $J$  = 13.7, 10.0, 9.9, 4.0 Hz, 1H), 1.12 – 1.10 (m, 1H), 1.12 – 1.08 (m, 1H), 0.88 (t,  $J$  = 6.9 Hz, 3H).

<sup>13</sup>C NMR (214 MHz, CDCl<sub>3</sub>)  $\delta$  174.16, 130.29, 129.80, 127.25, 127.13, 52.23, 51.43, 47.18, 42.31, 40.07, 36.95, 36.73, 36.70, 33.41, 32.40, 31.92, 31.60, 30.73, 24.72, 22.93, 14.15.

Figure S9: Full assignment of **7**
